# Supplementary material for: Assessing the Influence of Intraoperative Core Body Temperature on Postoperative Venous Thromboembolism after Abdominal Wall Reconstruction
Source: PubMed Central journal article supplement — Plast Reconstr Surg Glob Open. 2024 Apr 19;12(4):e5741. doi: 10.1097/GOX.0000000000005741 (PMC11030000; doi:10.1097/gox.0000000000005741), 2024-04-19
Supplement: gox-12-e5741-s001.pdf [file gox-12-e5741-s001.pdf]

## Supplemental Digital Content 1: Patient Characteristics

|                               | No DVT/PE at 30 days<br>(N=330) | DVT/PE at 30 days<br>(N=14) | Total<br>(N=344)  | P-value             |
|-------------------------------|---------------------------------|-----------------------------|-------------------|---------------------|
| <b>Age</b>                    |                                 |                             |                   | 0.1073 <sup>1</sup> |
| N (Missing)                   | 330 (0)                         | 14 (0)                      | 344 (0)           |                     |
| Mean (SD)                     | 55.5 (12.86)                    | 60.0 (10.37)                | 55.7 (12.79)      |                     |
| Median (IQR)                  | 56.8 (46.7, 64.8)               | 64.4 (54.6, 67.1)           | 57.1 (47.7, 64.8) |                     |
| Range                         | 20.8, 86.0                      | 31.7, 69.8                  | 20.8, 86.0        |                     |
| <b>Gender, n (%)</b>          |                                 |                             |                   | 0.3348 <sup>2</sup> |
| Male                          | 137 (41.5%)                     | 4 (28.6%)                   | 141 (41.0%)       |                     |
| Female                        | 193 (58.5%)                     | 10 (71.4%)                  | 203 (59.0%)       |                     |
| <b>Body Mass Index (kg/m)</b> |                                 |                             |                   | 0.3273 <sup>1</sup> |
| N (Missing)                   | 330 (0)                         | 14 (0)                      | 344 (0)           |                     |
| Mean (SD)                     | 33.1 (6.59)                     | 31.5 (5.39)                 | 33.1 (6.55)       |                     |
| Median (IQR)                  | 33.1 (28.7, 37.1)               | 31.9 (27.1, 34.2)           | 33.0 (28.7, 37.0) |                     |
| Range                         | 19.3, 84.7                      | 21.5, 42.2                  | 19.3, 84.7        |                     |
| <b>Smoking Status, n (%)</b>  |                                 |                             |                   | 0.7201 <sup>2</sup> |
| No                            | 327 (99.1%)                     | 14 (100.0%)                 | 341 (99.1%)       |                     |
| Current                       | 3 (0.9%)                        | 0 (0.0%)                    | 3 (0.9%)          |                     |
| <b>Diabetes, n (%)</b>        |                                 |                             |                   | 0.9095 <sup>2</sup> |
| No                            | 255 (77.3%)                     | 11 (78.6%)                  | 266 (77.3%)       |                     |
| Yes                           | 75 (22.7%)                      | 3 (21.4%)                   | 78 (22.7%)        |                     |
| <b>Hypertension, n (%)</b>    |                                 |                             |                   | 0.7458 <sup>2</sup> |
| No                            | 156 (47.3%)                     | 6 (42.9%)                   | 162 (47.1%)       |                     |

|                                                             | No DVT/PE at 30 days<br>(N=330) | DVT/PE at 30 days<br>(N=14) | Total<br>(N=344) | P-value             |
|-------------------------------------------------------------|---------------------------------|-----------------------------|------------------|---------------------|
| Yes                                                         | 174 (52.7%)                     | 8 (57.1%)                   | 182 (52.9%)      |                     |
| <b>Chronic Kidney Disease, n (%)</b>                        |                                 |                             |                  |                     |
|                                                             |                                 |                             |                  | 0.4376 <sup>2</sup> |
| No                                                          | 282 (85.5%)                     | 13 (92.9%)                  | 295 (85.8%)      |                     |
| Yes                                                         | 48 (14.5%)                      | 1 (7.1%)                    | 49 (14.2%)       |                     |
| <b>Chronic Liver Disease, n (%)</b>                         |                                 |                             |                  |                     |
|                                                             |                                 |                             |                  | 0.5555 <sup>2</sup> |
| No                                                          | 322 (97.6%)                     | 14 (100.0%)                 | 336 (97.7%)      |                     |
| Yes                                                         | 8 (2.4%)                        | 0 (0.0%)                    | 8 (2.3%)         |                     |
| <b>Immunosuppression, n (%)</b>                             |                                 |                             |                  |                     |
|                                                             |                                 |                             |                  | 0.0443 <sup>2</sup> |
| No                                                          | 279 (84.5%)                     | 9 (64.3%)                   | 288 (83.7%)      |                     |
| Yes                                                         | 51 (15.5%)                      | 5 (35.7%)                   | 56 (16.3%)       |                     |
| <b>Hypercoagulable Disorder or History of DVT/PE, n (%)</b> |                                 |                             |                  |                     |
|                                                             |                                 |                             |                  | 0.8642 <sup>2</sup> |
| No                                                          | 288 (87.3%)                     | 12 (85.7%)                  | 300 (87.2%)      |                     |
| Yes                                                         | 42 (12.7%)                      | 2 (14.3%)                   | 44 (12.8%)       |                     |
| <b>History of Malignancy, n (%)</b>                         |                                 |                             |                  |                     |
|                                                             |                                 |                             |                  | 0.4231 <sup>2</sup> |
| No                                                          | 318 (96.4%)                     | 13 (92.9%)                  | 331 (96.2%)      |                     |
| Yes                                                         | 12 (3.6%)                       | 1 (7.1%)                    | 13 (3.8%)        |                     |
| <b>COPD, n (%)</b>                                          |                                 |                             |                  |                     |
|                                                             |                                 |                             |                  | 0.9443 <sup>2</sup> |
| No                                                          | 308 (93.3%)                     | 13 (92.9%)                  | 321 (93.3%)      |                     |
| Yes                                                         | 22 (6.7%)                       | 1 (7.1%)                    | 23 (6.7%)        |                     |
| <b>Inpatient COVID status, n (%)</b>                        |                                 |                             |                  |                     |
|                                                             |                                 |                             |                  | 0.8366 <sup>2</sup> |

|                                                               | No DVT/PE at 30 days<br>(N=330) | DVT/PE at 30 days<br>(N=14) | Total<br>(N=344) | P-value             |
|---------------------------------------------------------------|---------------------------------|-----------------------------|------------------|---------------------|
| No                                                            | 329 (99.7%)                     | 14 (100.0%)                 | 343 (99.7%)      |                     |
| Yes                                                           | 1 (0.3%)                        | 0 (0.0%)                    | 1 (0.3%)         |                     |
| <b>Anti-coagulation medications, n (%)</b>                    |                                 |                             |                  | 0.9201 <sup>2</sup> |
| No                                                            | 304 (92.1%)                     | 13 (92.9%)                  | 317 (92.2%)      |                     |
| Yes                                                           | 26 (7.9%)                       | 1 (7.1%)                    | 27 (7.8%)        |                     |
| <b>Anti-coagulation medications held for operation, n (%)</b> |                                 |                             |                  | >0.999 <sup>2</sup> |
| No                                                            | 2 (7.7%)                        | 0 (0%)                      | 2 (7.4%)         |                     |
| Yes                                                           | 24 (92.3%)                      | 1 (100%)                    | 25 (92.6%)       |                     |
| <b>Anti-platelet medications, n (%)</b>                       |                                 |                             |                  | 0.7816 <sup>2</sup> |
| No                                                            | 269 (81.5%)                     | 11 (78.6%)                  | 280 (81.4%)      |                     |
| Yes                                                           | 61 (18.5%)                      | 3 (21.4%)                   | 64 (18.6%)       |                     |
| <b>Anti-platelet medications held for operation, n (%)</b>    |                                 |                             |                  | 0.7328 <sup>2</sup> |
| No                                                            | 15 (%)                          | 1 (%)                       | 16 (%)           |                     |
| Yes                                                           | 46 (%)                          | 2 (%)                       | 48 (%)           |                     |

<sup>1</sup>Kruskal-Wallis p-value; <sup>2</sup>Chi-Square p-value; IQR: Interquartile Range; COPD: Chronic Obstructive pulmonary Disease
