# Supplementary material for: Assessing the Influence of Intraoperative Core Body Temperature on Postoperative Venous Thromboembolism after Abdominal Wall Reconstruction
Source: PubMed Central journal article supplement — Plast Reconstr Surg Glob Open. 2024 Apr 19;12(4):e5741. doi: 10.1097/GOX.0000000000005741 (PMC11030000; doi:10.1097/gox.0000000000005741), 2024-04-19
Supplement: gox-12-e5741-s002.pdf [file gox-12-e5741-s002.pdf]

## Supplemental Digital Content 2: Operative Characteristics

|                                            | No DVT/PE at 30 days<br>(N=330) | DVT/PE at 30<br>days<br>(N=14) | Total<br>(N=344) | P-value             |
|--------------------------------------------|---------------------------------|--------------------------------|------------------|---------------------|
| <b>Component Separation, n</b><br>(%)      |                                 |                                |                  | 0.0765 <sup>1</sup> |
| No                                         | 124 (37.6%)                     | 2 (14.3%)                      | 126 (36.6%)      |                     |
| Yes                                        | 206 (62.4%)                     | 12 (85.7%)                     | 218 (63.4%)      |                     |
| <b>Type of Component Separation, n (%)</b> |                                 |                                |                  |                     |
| Anterior                                   | 106 (32.1%)                     | 6 (42.9%)                      | 112 (32.6%)      | 0.4011 <sup>1</sup> |
| Posterior                                  | 112 (33.9%)                     | 6 (42.9%)                      | 118 (34.3%)      | 0.4912 <sup>1</sup> |
| <b>Mesh, n (%)</b>                         |                                 |                                |                  |                     |
| No                                         | 13 (3.9%)                       | 1 (7.1%)                       | 14 (4.1%)        |                     |
| Yes                                        | 317 (96.1%)                     | 13 (92.9%)                     | 330 (95.9%)      | 0.5524 <sup>1</sup> |
| <b>Mesh Plane, n (%)</b>                   |                                 |                                |                  |                     |
| Sublay (Retrorectus)                       | 166 (50.3%)                     | 6 (42.9%)                      | 172 (50.0%)      | 0.5852 <sup>1</sup> |
| Inlay (Interposition)                      | 11 (3.3%)                       | 0 (0.0%)                       | 11 (3.2%)        | 0.4875 <sup>1</sup> |
| Onlay (Subcutaneous)                       | 10 (3.0%)                       | 0 (0.0%)                       | 10 (2.9%)        | 0.5086 <sup>1</sup> |
| Underlay (Intraperitoneal)                 | 23 (37.3%)                      | 7 (50.0%)                      | 130 (37.8%)      | 0.3361 <sup>1</sup> |
| <b>Defect Location, n (%)</b>              |                                 |                                |                  |                     |
| Ventral                                    | 292 (88.5%)                     | 12 (85.7%)                     | 304 (88.4%)      | 0.7514 <sup>1</sup> |
| Flank                                      | 33 (10.0%)                      | 0 (0.0%)                       | 33 (9.6%)        | 0.2133 <sup>1</sup> |
| Umbilical                                  | 21 (6.4%)                       | 0 (0.0%)                       | 21 (6.1%)        | 0.3300 <sup>1</sup> |
| Parastomal                                 | 35 (10.6%)                      | 1 (7.1%)                       | 36 (10.5%)       | 0.6784 <sup>1</sup> |

|                                   | No DVT/PE at 30 days<br>(N=330) | DVT/PE at 30<br>days<br>(N=14) | Total<br>(N=344)    | P-value             |
|-----------------------------------|---------------------------------|--------------------------------|---------------------|---------------------|
| <b>Defect Total Area (cm)</b>     |                                 |                                |                     | 0.0870 <sup>2</sup> |
| N (Missing)                       | 274 (56)                        | 12 (2)                         | 286 (58)            |                     |
| Mean (SD)                         | 186.8 (149.11)                  | 254.6 (148.39)                 | 189.7 (149.44)      |                     |
| Median (IQR)                      | 154.8 (66.1, 279.7)             | 274.6 (101.8,<br>368.8)        | 156.1 (67.5, 280.8) |                     |
| Range                             | 2.3, 759.0                      | 40.6, 464.8                    | 2.3, 759.0          |                     |
| <b>Defect Width (cm)</b>          |                                 |                                |                     | 0.3087 <sup>2</sup> |
| N (Missing)                       | 277 (53)                        | 12 (2)                         | 289 (55)            |                     |
| Mean (SD)                         | 11.0 (5.01)                     | 12.3 (4.35)                    | 11.1 (4.98)         |                     |
| Median (IQR)                      | 10.7 (7.3, 13.8)                | 11.5 (8.7, 16.3)               | 10.7 (7.5, 14.0)    |                     |
| Range                             | 1.5, 30.3                       | 7.0, 19.0                      | 1.5, 30.3           |                     |
| <b>Fascial Closure, n (%)</b>     |                                 |                                |                     |                     |
| Primary Closure                   | 306 (92.7%)                     | 12 (92.3%)                     | 318 (92.7%)         | 0.9545 <sup>1</sup> |
| Bridged Repair                    | 20 (6.1%)                       | 1 (7.7%)                       | 21 (6.1%)           | 0.8098 <sup>1</sup> |
| Missing                           | 0                               | 2                              | 2                   |                     |
| <b>Concurrent Plastic Surgery</b> |                                 |                                |                     | 0.4526 <sup>1</sup> |
| <b>Procedures, n (%)</b>          |                                 |                                |                     |                     |
| No                                | 299 (95.8%)                     | 13 (100.0%)                    | 312 (96.0%)         |                     |
| Yes                               | 13 (4.2%)                       | 0 (0.0%)                       | 13 (4.0%)           |                     |
| Missing                           | 18                              | 1                              | 19                  |                     |
| <b>PIP baseline</b>               |                                 |                                |                     | 0.2555 <sup>2</sup> |

|                                   | No DVT/PE at 30 days<br>(N=330) | DVT/PE at 30<br>days<br>(N=14) | Total<br>(N=344)  | P-value              |
|-----------------------------------|---------------------------------|--------------------------------|-------------------|----------------------|
| N (Missing)                       | 298 (32)                        | 11 (3)                         | 309 (35)          |                      |
| Mean (SD)                         | 19.7 (3.70)                     | 18.5 (2.58)                    | 19.6 (3.67)       |                      |
| Median (IQR)                      | 19.0 (17.0, 22.0)               | 18.0 (16.0, 19.0)              | 19.0 (17.0, 22.0) |                      |
| Range                             | 12.0, 32.0                      | 16.0, 23.0                     | 12.0, 32.0        |                      |
| <b>PIP end of case</b>            |                                 |                                |                   | 0.2373 <sup>2</sup>  |
| N (Missing)                       | 302 (28)                        | 11 (3)                         | 313 (31)          |                      |
| Mean (SD)                         | 21.8 (4.82)                     | 22.7 (3.17)                    | 21.8 (4.77)       |                      |
| Median (IQR)                      | 21.0 (18.0, 25.0)               | 22.0 (21.0, 26.0)              | 21.0 (18.0, 25.0) |                      |
| Range                             | 13.0, 38.0                      | 17.0, 27.0                     | 13.0, 38.0        |                      |
| <b>PIP difference (mm H2O)</b>    |                                 |                                |                   | 0.0099* <sup>2</sup> |
| N (Missing)                       | 298 (32)                        | 11 (3)                         | 309 (35)          |                      |
| Mean (SD)                         | 2.2 (3.15)                      | 4.3 (2.76)                     | 2.3 (3.16)        |                      |
| Median (IQR)                      | 1.0 (0.0, 4.0)                  | 3.0 (2.0, 6.0)                 | 2.0 (0.0, 4.0)    |                      |
| Range                             | -10.0, 16.0                     | 1.0, 10.0                      | -10.0, 16.0       |                      |
| <b>Minimum intra-op core temp</b> |                                 |                                |                   | 0.4870 <sup>2</sup>  |
| N (Missing)                       | 330 (0)                         | 14 (0)                         | 344 (0)           |                      |
| Mean (SD)                         | 35.5 (0.76)                     | 35.5 (0.54)                    | 35.5 (0.75)       |                      |
| Median (IQR)                      | 35.6 (35.2, 35.9)               | 35.4 (35.2, 35.8)              | 35.6 (35.2, 35.9) |                      |
| Range                             | 30.2, 38.6                      | 34.3, 36.6                     | 30.2, 38.6        |                      |
| <b>Maximum intra-op core temp</b> |                                 |                                |                   | 0.6524 <sup>2</sup>  |

|                                                   | No DVT/PE at 30 days<br>(N=330) | DVT/PE at 30 days<br>(N=14) | Total<br>(N=344)     | P-value               |
|---------------------------------------------------|---------------------------------|-----------------------------|----------------------|-----------------------|
| N (Missing)                                       | 330 (0)                         | 14 (0)                      | 344 (0)              |                       |
| Mean (SD)                                         | 37.1 (0.69)                     | 37.3 (1.05)                 | 37.1 (0.71)          |                       |
| Median (IQR)                                      | 37.1 (36.6, 37.5)               | 37.3 (36.7, 37.5)           | 37.1 (36.6, 37.5)    |                       |
| Range                                             | 35.5, 40.2                      | 36.2, 40.5                  | 35.5, 40.5           |                       |
| <b>Mean intra-op core temp</b>                    |                                 |                             |                      | 0.6021 <sup>2</sup>   |
| N (Missing)                                       | 330 (0)                         | 14 (0)                      | 344 (0)              |                       |
| Mean (SD)                                         | 36.4 (0.57)                     | 36.3 (0.45)                 | 36.4 (0.56)          |                       |
| Median (IQR)                                      | 36.4 (36.0, 36.8)               | 36.4 (36.0, 36.7)           | 36.4 (36.0, 36.8)    |                       |
| Range                                             | 34.4, 38.9                      | 35.5, 37.0                  | 34.4, 38.9           |                       |
| <b>Total OR Time (min)</b>                        |                                 |                             |                      | 0.0928 <sup>2</sup>   |
| N (Missing)                                       | 328 (2)                         | 14 (0)                      | 342 (2)              |                       |
| Mean (SD)                                         | 386.6 (115.02)                  | 478.6 (212.14)              | 390.4 (121.39)       |                       |
| Median (IQR)                                      | 377.0 (309.0, 455.5)            | 422.5 (360.0, 521.0)        | 378.0 (310.0, 458.0) |                       |
| Range                                             | 142.0, 867.0                    | 210.0, 1018.0               | 142.0, 1018.0        |                       |
| <b>Days in Hospital<br/>(Discharged on POD #)</b> |                                 |                             |                      | 0.0002 <sup>*,2</sup> |
| N (Missing)                                       | 330 (0)                         | 14 (0)                      | 344 (0)              |                       |
| Mean (SD)                                         | 6.4 (6.01)                      | 16.1 (19.61)                | 6.8 (7.28)           |                       |
| Median (IQR)                                      | 5.0 (3.0, 7.0)                  | 8.0 (7.0, 12.0)             | 5.0 (4.0, 7.0)       |                       |
| Range                                             | 2.0, 51.0                       | 4.0, 76.0                   | 2.0, 76.0            |                       |

<sup>1</sup>Chi-Square p-value; <sup>2</sup>Kruskal-Wallis p-value; PIP: Peak Inspiratory Pressure; IQR: Interquartile Range; SD: Standard Deviation; \*Statistically significant (p<0.05)
